# Supplementary material for: Improving patient rehabilitation performance in exercise games using collaborative filtering approach
Source: PeerJ Comput Sci. 2021 Jul 14;7:e599. doi: 10.7717/peerj-cs.599 (PMC8293928; doi:10.7717/peerj-cs.599)
Supplement: Supplemental Information 2 — A codebook can be used to convert numbers to their respective factors. [file peerj-cs-07-599-s002.xlsx]

## Sheet: codebook 
	Name	ID
Difficulty	Easy	1
	Medium	2
	Hard	3
Side	Left	51
	Right	52
	BothIndependently	53
	NotApplicable	54
Daignosis	stroke	32
	Healthy	31
	brain injury	36
	CP	35
	humerus	37
	SCI	34
	TBI	33
GameID	Airplane	101
	Atlantis	102
	Animals	103
	Basketball	104
	Butterfly	105
	Catch	106
	Color Blocks	107
	Color Clouds	108
	Firefly	109
	Fishing	110
	Flight Control	111
	Follow	112
	Forest Leaves	113
	Grab	114
	Izzy the bee	115
	Jugger	116
	Looney Football	117
	Matchday Striker	118
	Memory Scape	119
	Move	120
	Music Box	121
	Nback	122
	Nimble	123
	Piano	124
	Powerhouse Bid	125
	Range of Motion Drills	126
	Seasons	127
	Space Ship	128
	Star Find	129
	Task Swap	130
Weakside	upper body, left and right	1
	upper and lower, left side	2
	Lower body, Left & Right	3
	Left	4
	Lower body, Left	5
	None	6
	Right	7
	Right leg	8
	upper and lower, Right	9
	upper and lower, Left	10
	upper and lower, Left & Right	11
	upper, Right	12
	upper Right & Lower Left	13
	upper Right & Lower Left & Right	14
MovementID	Shoulder Rotation in Abduction	1
	Shoulder Abduction	2
	Elbow Flexion in Abduction	4
	Functional Reach	5
	Side Taps	6
	Full Body Turn	7
	Shoulder Rotation	8
	Elbow Flexion	9
	General - Shoulder	10
	Shoulder Frontal Flexion	11
	Sit to Stand	12
	Squats	13
	Hip Abduction	14
	Knee Flexion	15
	Shoulder External Rotation in Abduction	16
	Shoulder Internal Rotation in Abduction	17
	Shoulder External Rotation	18
	Shoulder Internal Rotation	19
	Side Steps	20
	General - Spine	21
	General - Full Body	22
	Lunges	23
	Side Strides	24
	Proprioception	25
